# Supplementary material for: Metabolomics and Molecular Networking to Characterize the Chemical Space of Four Momordica Plant Species
Source: MDPI journal article supplement (doi:10.3390/metabo11110763), 2021-11-08
Supplement: s1 [file s1]

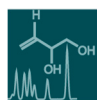

---

**1. Network analysis, in silico annotation and substructure annotation job links**

Molecular network ESI(-): <https://gnps.ucsd.edu/ProteoSAFe/status.jsp?task=8cbf62e1396c4008bad70ebf22254683>

Network propagation annotation ESI(-): <https://proteomics2.ucsd.edu/ProteoSAFe/status.jsp?task=6a7f35441ed04f98b0d2b83471a4f762>

DEREPLICATOR ESI(-): <https://gnps.ucsd.edu/ProteoSAFe/status.jsp?task=35e70a6bac1c4bc88e25b41c93010bce>

MS2LDA ESI(-): <https://gnps.ucsd.edu/ProteoSAFe/status.jsp?task=7c498c0448724335845f2f72e85b1c20>

MolNetEnhancer ESI (-): <https://gnps.ucsd.edu/ProteoSAFe/status.jsp?task=700d9c1608774c47bc4d9961420c01da>

Molecular network ESI(+): <https://gnps.ucsd.edu/ProteoSAFe/status.jsp?task=2abe21d19056482da10e5150e969d621>

Network propagation annotation ESI(+): <https://proteomics2.ucsd.edu/ProteoSAFe/status.jsp?task=441f7a37e2a249c680bf5fd9d527f9fc>

DEREPLICATOR ESI(+): <https://gnps.ucsd.edu/ProteoSAFe/status.jsp?task=35e70a6bac1c4bc88e25b41c93010bce>

MS2LDA ESI(+): <https://gnps.ucsd.edu/ProteoSAFe/status.jsp?task=ff8361dd58c14848bcd9b0647ce7c215>

MolNetEnhancer ESI (+): <https://gnps.ucsd.edu/ProteoSAFe/status.jsp?task=8cfa702d7def4b72a108abbf9bade39f>

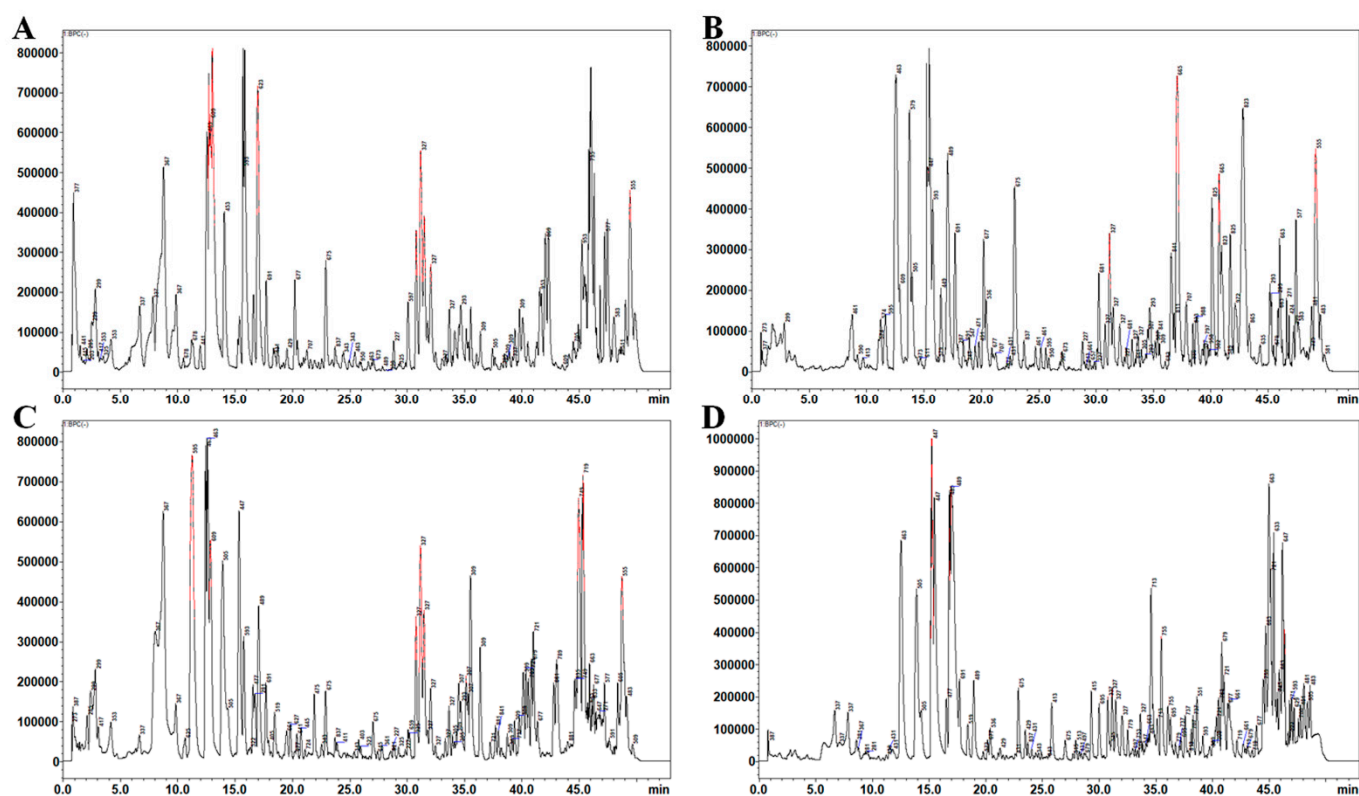

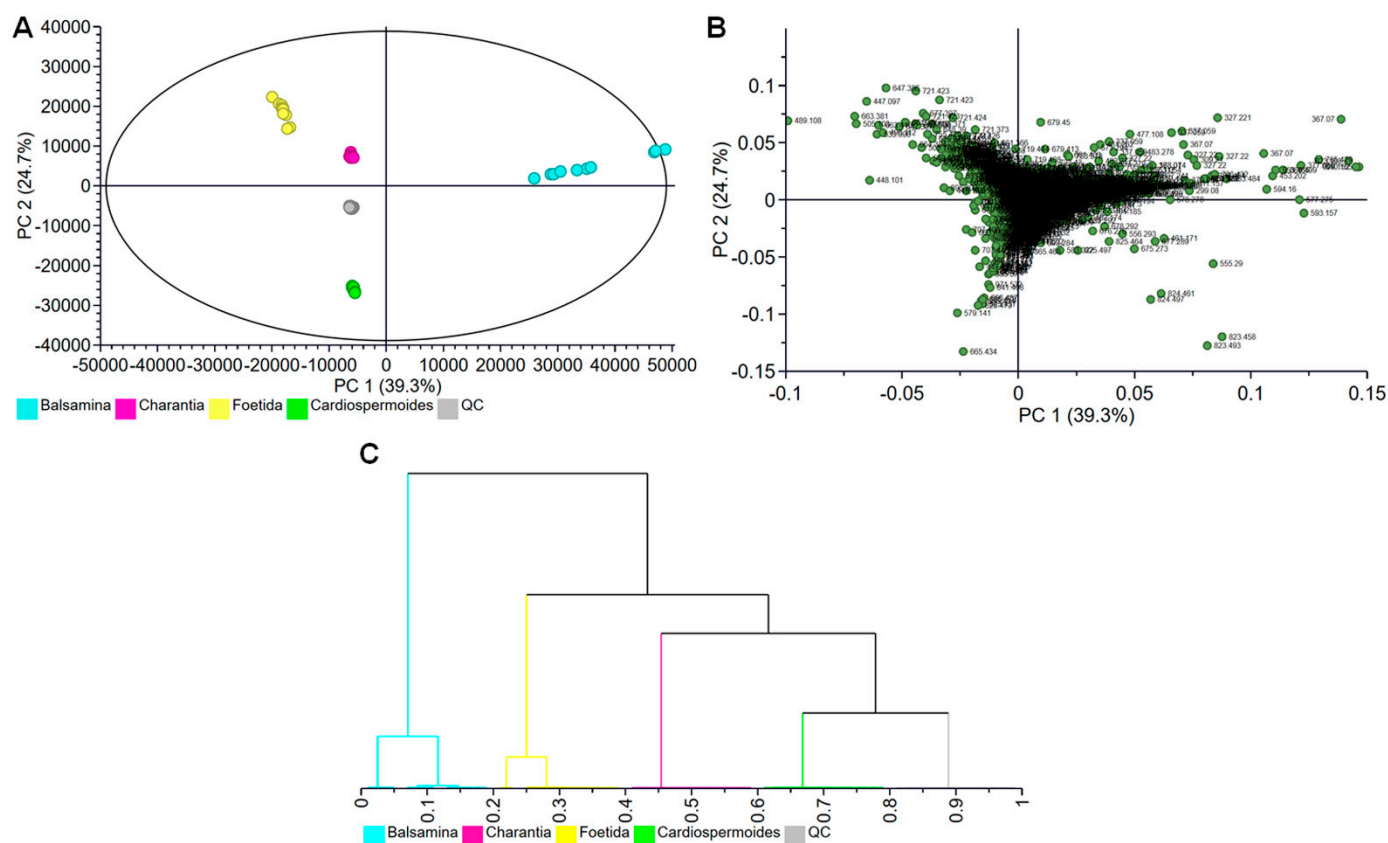

**Figure S2:** Unsupervised analysis of ESI negative data of *M. balsamina*, *M. Charantia*, *M. foetida* and *M. Cardiospermoides*. A PCA scores plot of the Pareto-scaled dataset of the four species including the quality control samples. The generated model was a 6-component model with PC 1 and PC 2 explaining 64% of the variation (A). The PCA loadings plot showing metabolites (outside the square) that contributed to the intrinsic patterns observed in the data set indicated in the scores plot (B). The HCA dendrogram indicating the hierarchical structure of the dataset, highlighting some species-specific metabolite differences (B).

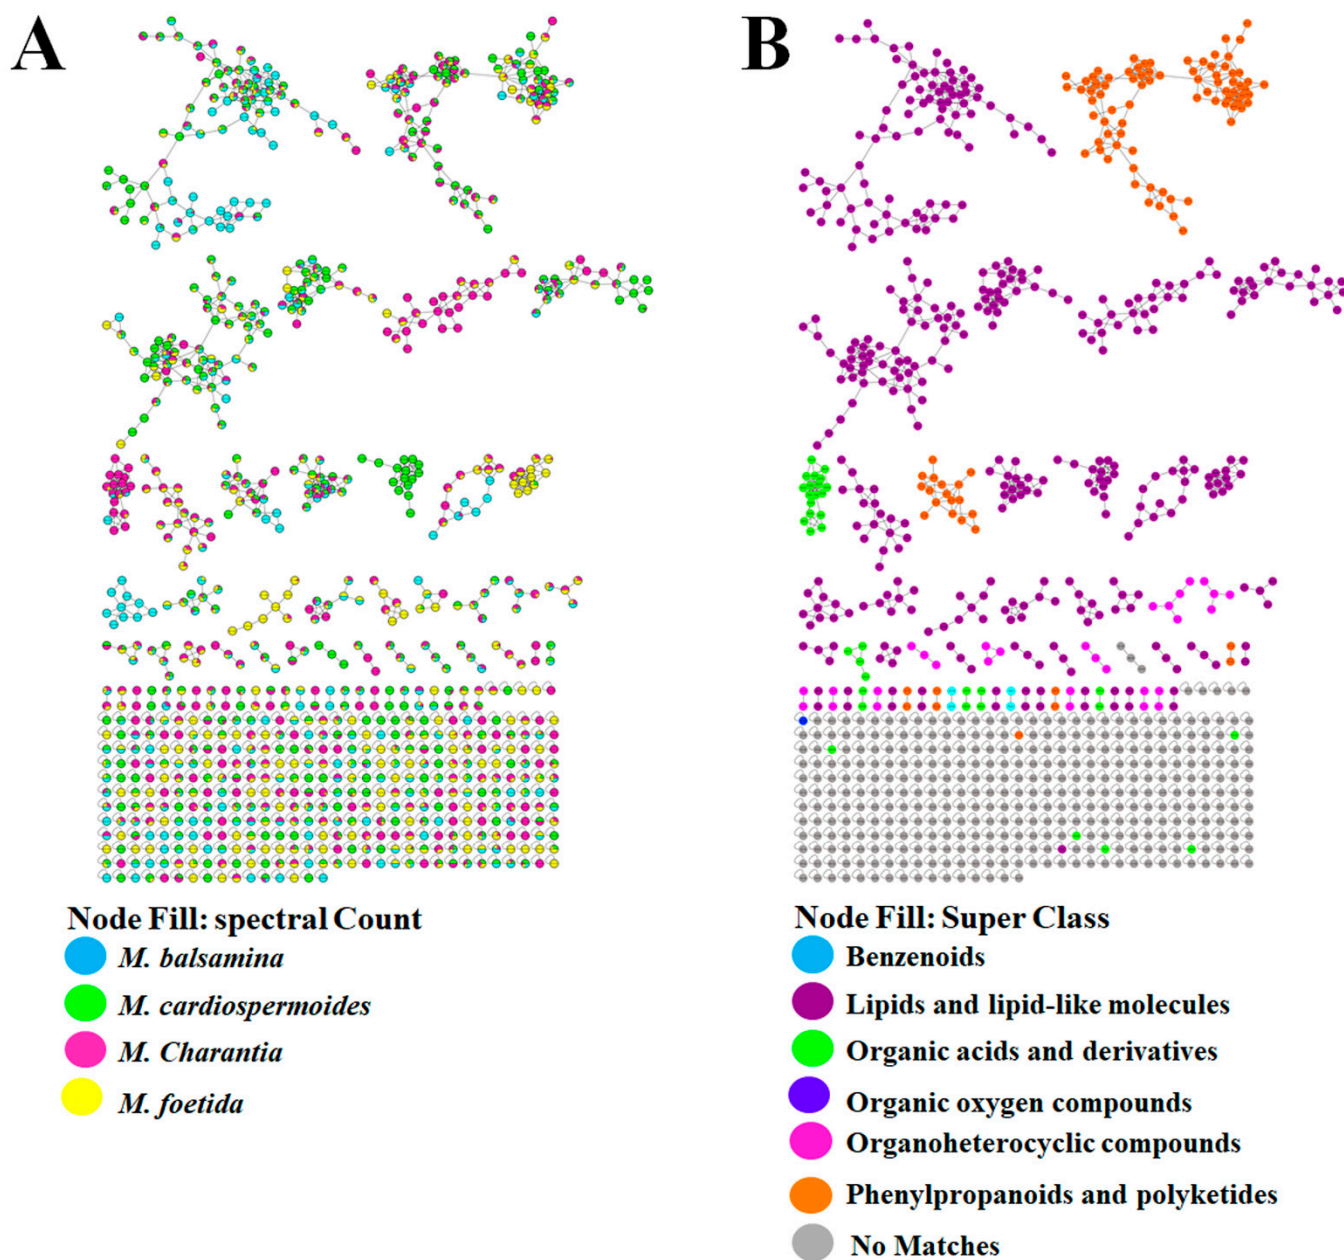

**Figure S3:** Molecular Network (A) of *M. balsaima*, *M. charantia*, *M. foetida* and *M. cardiospermoides* for data generated using a liquid chromatography-tandem mass spectrometry using electrospray ionisation in negative mode. (B) MolNetEnhancer output showing different super classes within the four species.

**Table S1:** Profiling of metabolites in *Momordica balsamina*, *Momordica cardiospermoides*, *Momordica charantia* and *Momordica Foetida* reported to level 2 or 3 of the Metabolomics standards initiative [51]. These metabolites were annotated from ESI (-) and ESI (+) data of the methanol extracts of the four *Momordica* species. Distribution of metabolites across the species is indicated by ✓ (presence) and ✕ (absence).

| No. | <i>m/z</i> | Adduct             | Rt   | Elemental composition                                         | Fragment ions      | Putative annotation                  | Superclass                    | Class                               | Subclass                                  | <i>M.bal-samina</i> | <i>M. cardio-sper-moides</i> | <i>M. char-antia</i> | <i>M. foet-ida</i> |
|-----|------------|--------------------|------|---------------------------------------------------------------|--------------------|--------------------------------------|-------------------------------|-------------------------------------|-------------------------------------------|---------------------|------------------------------|----------------------|--------------------|
| 1   | 191.0216   | [M-H] <sup>-</sup> | 1.02 | C <sub>6</sub> H <sub>8</sub> O <sub>7</sub>                  | 111                | Isocitric acid                       | Organic acids and derivatives | Carboxylic acids and derivatives    | Tricarboxylic acids and derivatives       | ✓                   | ✓                            | ✓                    | ✓                  |
| 2   | 328.1366   | [M+H] <sup>+</sup> | 1.08 | C <sub>15</sub> H <sub>21</sub> NO <sub>7</sub>               | 264, 166, 132      | N-(1-deoxy-1-fructosyl)phenylalanine | Organic acids and derivatives | Carboxylic acids and derivatives    | Amino acids                               | ✓                   | ✓                            | ✕                    | ✓                  |
| 3   | 367.1472   | [M+H] <sup>+</sup> | 1.16 | C <sub>17</sub> H <sub>22</sub> N <sub>2</sub> O <sub>7</sub> | 229, 188           | Tryptophan N-glucoside               | Carbohydrates                 | Glycosides                          | glucosides                                | ✓                   | ✓                            | ✕                    | ✓                  |
| 4   | 195.0522   | [M-H] <sup>-</sup> | 1.18 | C <sub>6</sub> H <sub>12</sub> O <sub>7</sub>                 | 191                | Gluconic acid                        | Organic oxygen compounds      | Organooxygen compounds              | Carbohydrates and carbohydrate conjugates | ✓                   | ✓                            | ✓                    | ✓                  |
| 5   | 164.0728   | [M-H] <sup>-</sup> | 1.38 | C <sub>9</sub> H <sub>11</sub> NO <sub>2</sub>                | 147                | Phenylalanine                        | Organic acids and derivatives | Carboxylic acids and derivatives    | Amino acids                               | ✓                   | ✓                            | ✓                    | ✓                  |
| 6   | 133.0150   | [M-H] <sup>-</sup> | 1.40 | C <sub>4</sub> H <sub>6</sub> O <sub>5</sub>                  | 115                | Malic acid                           | Organic acids and derivatives | Hydroxy acids and derivatives       | Carboxylic acids                          | ✓                   | ✓                            | ✓                    | ✓                  |
| 7   | 315.0746   | [M-H] <sup>-</sup> | 1.50 | C <sub>13</sub> H <sub>16</sub> O <sub>9</sub>                | 153, 152, 109, 108 | 2,5-Dihydroxybenzoic acid            | Benzenoids                    | Benzene and substituted derivatives | Benzoic acids and derivatives             | ✓                   | ✓                            | ✓                    | ✓                  |
| 8   | 203.0842   | [M-H] <sup>-</sup> | 1.74 | C <sub>11</sub> H <sub>12</sub> N <sub>2</sub> O <sub>2</sub> | 142, 116           | Tryptophan                           | Organic acids and derivatives | Carboxylic acids and derivatives    | Amino acid                                | ✓                   | ✓                            | ✓                    | ✓                  |
| 9   | 137.0252   | [M-H] <sup>-</sup> | 2.75 | C <sub>7</sub> H <sub>6</sub> O <sub>3</sub>                  | -                  | Hydroxybenzoic acid                  | Benzenoids                    | Benzene and substituted derivatives | Benzoic acids and derivatives             | ✓                   | ✓                            | ✓                    | ✓                  |
| 10  | 299.0793   | [M-H] <sup>-</sup> | 2.95 | C <sub>13</sub> H <sub>16</sub> O <sub>8</sub>                | 137                | Hydroxybenzoic acid glucoside        | Benzenoids                    | Benzene and substituted derivatives | Benzoic acids and derivatives             | ✓                   | ✓                            | ✓                    | ✓                  |

|    |          |                    |      |                                                 |                         |                                                                                                                    |                                  |                                |                                       |   |   |   |   |
|----|----------|--------------------|------|-------------------------------------------------|-------------------------|--------------------------------------------------------------------------------------------------------------------|----------------------------------|--------------------------------|---------------------------------------|---|---|---|---|
| 11 | 565.1519 | [M+H] <sup>+</sup> | 3.20 | C <sub>26</sub> H <sub>28</sub> O <sub>14</sub> | 303                     | Kaempferol 3-rhamnoside-7-xyloside                                                                                 | Phenylpropanoids and polyketides | Flavonoids                     | Flavonoid glycosides                  | × | × | ✓ | × |
| 12 | 353.0541 | [M-H] <sup>-</sup> | 3.81 | C <sub>15</sub> H <sub>14</sub> O <sub>10</sub> | 191,155, 111            | 5-Caffeoylisocitric acid                                                                                           | Phenylpropanoids and polyketides | Cinnamic acids and derivatives | Hydroxycinnamic acids and derivatives | ✓ | × | ✓ | × |
| 13 | 195.0633 | [M+H] <sup>+</sup> | 4.06 | C <sub>10</sub> H <sub>10</sub> O <sub>4</sub>  | 149, 117                | Ferulic acid                                                                                                       | Phenylpropanoids and polyketides | Cinnamic acids and derivatives | Hydroxycinnamic acids and derivatives | ✓ | × | ✓ | ✓ |
| 14 | 355.1061 | [M-H] <sup>-</sup> | 5.10 | C <sub>16</sub> H <sub>20</sub> O <sub>9</sub>  | 193, 179, 163, 134      | Feruloyl-D-glucose                                                                                                 | Phenylpropanoids and polyketides | Cinnamic acids and derivatives | Hydroxycinnamic acids and derivatives | ✓ | × | × | × |
| 15 | 303.0478 | [M+H] <sup>+</sup> | 5.13 | C <sub>15</sub> H <sub>10</sub> O <sub>7</sub>  | 257, 153                | Quercetin                                                                                                          | Phenylpropanoids and polyketides | Flavonoids                     | Flavanols                             | ✓ | ✓ | ✓ | ✓ |
| 16 | 163.0416 | [M-H] <sup>-</sup> | 5.21 | C <sub>9</sub> H <sub>8</sub> O <sub>3</sub>    | 119                     | Coumaric acid                                                                                                      | Phenylpropanoids and polyketides | Cinnamic acids and derivatives | Hydroxycinnamic acids and derivatives | ✓ | ✓ | ✓ | ✓ |
| 17 | 465.0989 | [M+H] <sup>+</sup> | 5.24 | C <sub>21</sub> H <sub>20</sub> O <sub>12</sub> | 303                     | Quercetin glucoside, Isoquercitrin, Spiraeoside 1                                                                  | Phenylpropanoids and polyketides | Flavonoids                     | Flavonoid glycosides                  | ✓ | ✓ | ✓ | ✓ |
| 18 | 595.1703 | [M-H] <sup>-</sup> | 5.43 | C <sub>27</sub> H <sub>32</sub> O <sub>15</sub> | 475, 415, 385, 355, 313 | 6,8-di-C-glucopyranosylnaringenin                                                                                  | Phenylpropanoids and polyketides | Flavonoids                     | Flavonoid glycosides                  | ✓ | × | ✓ | ✓ |
| 19 | 287.0530 | [M+H] <sup>+</sup> | 5.87 | C <sub>15</sub> H <sub>10</sub> O <sub>6</sub>  | 153                     | Kaempferol                                                                                                         | Phenylpropanoids and polyketides | Flavonoids                     | Flavanols                             | ✓ | ✓ | ✓ | ✓ |
| 20 | 595.1614 | [M+H] <sup>+</sup> | 6.51 | C <sub>27</sub> H <sub>30</sub> O <sub>15</sub> | 449, 287                | 7-[4,5-dihydroxy-6-(hydroxymethyl)-3-[(2S,3R,4R,5R,6S)-3,4,5-trihydroxy-6-methyloxan-2-yl]oxyoxan-2-yl]oxy-2-(3,4- | Phenylpropanoids and polyketides | Flavonoids                     | Flavonoid glycosides                  | × | ✓ | ✓ | × |

|    |          |                    |       |                                                              |                         |                                                            |                                  |                                           |                                       |   |   |   |   |
|----|----------|--------------------|-------|--------------------------------------------------------------|-------------------------|------------------------------------------------------------|----------------------------------|-------------------------------------------|---------------------------------------|---|---|---|---|
|    |          |                    |       |                                                              |                         | dihydroxy-phenyl)-5-hydroxy-chromen-4-one                  |                                  |                                           |                                       |   |   |   |   |
| 21 | 385.1167 | [M-H] <sup>-</sup> | 7.10  | C <sub>17</sub> H <sub>22</sub> O <sub>10</sub>              | 223, 298, 179, 164, 179 | Sinapoyl glycoside                                         | Organooxygen compound            | Carbohydrates and carbohydrate derivative | Carbohydrate derivative               | ✓ | ✓ | ✗ | ✗ |
| 22 | 337.0592 | [M-H] <sup>-</sup> | 7.63  | C <sub>15</sub> H <sub>14</sub> O <sub>9</sub>               | 173, 154, 111           | 4-Coumaroyl-isocitric acid                                 | Phenylpropanoids and polyketides | Cinnamic acids and derivatives            | Hydroxycinnamic acids and derivatives | ✓ | ✗ | ✓ | ✓ |
| 23 | 609.1528 | [M-H] <sup>-</sup> | 8.35  | C <sub>27</sub> H <sub>31</sub> O <sub>16</sub> <sup>+</sup> | 447, 285                | Cyanidin-3, 5-di-O-glucoside                               | Phenylpropanoids and polyketides | Flavonoids                                | Flavonoid glycosides                  | ✗ | ✓ | ✗ | ✗ |
| 24 | 367.0702 | [M-H] <sup>-</sup> | 8.65  | C <sub>16</sub> H <sub>16</sub> O <sub>19</sub>              | 173, 154, 111           | 4-Feruloyl-isocitric acid                                  | Phenylpropanoids and polyketides | Cinnamic acids and derivatives            | Hydroxycinnamic acids and derivatives | ✓ | ✗ | ✓ | ✗ |
| 25 | 563.1455 | [M-H] <sup>-</sup> | 11.10 | C <sub>26</sub> H <sub>28</sub> O <sub>14</sub>              | 545, 531, 443, 353,     | Apigenin 6-C-glucoside 8-C-arabinoside                     | Phenylpropanoids and polyketides | Flavonoids                                | Flavonoid glycosides                  | ✗ | ✓ | ✗ | ✗ |
| 26 | 595.1324 | [M-H] <sup>-</sup> | 11.27 | C <sub>26</sub> H <sub>22</sub> O <sub>16</sub>              | 300                     | Quercetin pentosylhexoside/ quercetin-3-O-arabinoglucoside | Phenylpropanoids and polyketides | Flavonoids                                | Flavonoid glycosides                  | ✗ | ✓ | ✗ | ✓ |
| 27 | 463.0898 | [M-H] <sup>-</sup> | 12.31 | C <sub>12</sub> H <sub>20</sub> O <sub>12</sub>              | 300                     | Quercetin glucoside, Isoquercitrin, Spiraoside 2           | Phenylpropanoids and polyketides | Flavonoids                                | Flavonoid glycosides                  | ✓ | ✓ | ✓ | ✓ |
| 28 | 609.2680 | [M-H] <sup>-</sup> | 12.89 | C <sub>27</sub> H <sub>30</sub> O <sub>16</sub>              | 300                     | Quercetin rutinoside 1/ rutin                              | Phenylpropanoids and polyketides | Flavonoids                                | Flavonoid glycosides                  | ✓ | ✓ | ✗ | ✓ |
| 29 | 609.1523 | [M-H] <sup>-</sup> | 13.07 | C <sub>27</sub> H <sub>30</sub> O <sub>16</sub>              | 300                     | Quercetin rutinoside 2/ rutin                              | Phenylpropanoids and polyketides | Flavonoids                                | Flavonoid glycosides                  | ✓ | ✓ | ✗ | ✓ |
| 30 | 579.138  | [M-H] <sup>-</sup> | 13.46 | C <sub>26</sub> H <sub>22</sub> O <sub>15</sub>              | 284                     | Kaempferol-3-O-hexose-O-pentoside                          | Phenylpropanoids and polyketides | Flavonoids                                | Flavonoid glycosides                  | ✗ | ✓ | ✗ | ✗ |

|    |          |                    |       |                                                              |                    |                                                                    |                                  |            |                      |   |   |   |   |
|----|----------|--------------------|-------|--------------------------------------------------------------|--------------------|--------------------------------------------------------------------|----------------------------------|------------|----------------------|---|---|---|---|
| 31 | 505.1002 | [M-H] <sup>-</sup> | 13.59 | C <sub>23</sub> H <sub>21</sub> O <sub>13</sub>              | 300                | Quercetin acetyl hexose 1                                          | Phenylpropanoids and polyketides | Flavonoids | Flavonoid glycosides | × | ✓ | ✓ | ✓ |
| 32 | 579.1408 | [M-H] <sup>-</sup> | 13.76 | C <sub>26</sub> H <sub>28</sub> O <sub>15</sub>              | 284                | Kaempferol 3-apiosyl-(1->2)-galactoside/Kaempferol 3-vicianoside 1 | Phenylpropanoids and polyketides | Flavonoids | Flavonoid glycosides | × | ✓ | × | × |
| 33 | 681.1365 | [M-H] <sup>-</sup> | 13.78 | C <sub>29</sub> H <sub>31</sub> O <sub>19</sub> <sup>+</sup> | 637, 300           | Delphinidin 3-(6''-malonylsambubioside)                            | Phenylpropanoids and polyketides | Flavonoids | Flavonoid glycosides | × | ✓ | × | × |
|    | 549.1790 | [M-H] <sup>-</sup> |       | C <sub>24</sub> H <sub>22</sub> O <sub>15</sub>              | 505, 300, 151      | Quercetin-3-O-malonyl-glucoside1                                   | Phenylpropanoids and polyketides | Flavonoids | Flavonoid glycosides | × | ✓ | ✓ | ✓ |
| 34 | 579.1407 | [M-H] <sup>-</sup> | 14.01 | C <sub>26</sub> H <sub>28</sub> O <sub>15</sub>              | 285                | Kaempferol 7-apiosyl-(1->2)-galactoside/Kaempferol 7-vicianoside 2 | Phenylpropanoids and polyketides | Flavonoids | Flavonoid glycosides | × | × | ✓ | × |
| 35 | 549.0935 | [M-H] <sup>-</sup> | 14.34 | C <sub>24</sub> H <sub>22</sub> O <sub>15</sub>              | 505, 300, 151      | Quercetin-3-O-malonyl-glucoside1                                   | Phenylpropanoids and polyketides | Flavonoids | Flavonoid glycosides | ✓ | ✓ | ✓ | ✓ |
| 36 | 505.1033 | [M-H] <sup>-</sup> | 14.9  | C <sub>23</sub> H <sub>21</sub> O <sub>13</sub>              | 300                | Quercetin acetyl hexose 2                                          | Phenylpropanoids and polyketides | Flavonoids | Flavonoid glycosides | ✓ | ✓ | ✓ | ✓ |
| 37 | 609.1514 | [M-H] <sup>-</sup> | 15.29 | C <sub>27</sub> H <sub>30</sub> O <sub>16</sub>              | 315                | Isorhamnetin 3-glucoside-7- $\alpha$ -L-arabinopyranoside          | Phenylpropanoids and polyketides | Flavonoids | Flavonoid glycosides | × | ✓ | × | × |
| 38 | 447.1080 | [M-H] <sup>-</sup> | 15.43 | C <sub>21</sub> H <sub>20</sub> O <sub>11</sub>              | 284, 255, 227, 151 | Kaempferol glucoside 1                                             | Phenylpropanoids and polyketides | Flavonoids | Flavonoid glycosides | ✓ | ✓ | ✓ | ✓ |
| 39 | 549.0931 | [M-H] <sup>-</sup> | 16.23 | C <sub>24</sub> H <sub>22</sub> O <sub>15</sub>              | 505, 300           | Quercetin-3-O-malonyl-glucoside2                                   | Phenylpropanoids and polyketides | Flavonoids | Flavonoid glycosides | ✓ | ✓ | ✓ | ✓ |
| 40 | 447.0995 | [M-H] <sup>-</sup> | 16.61 | C <sub>21</sub> H <sub>20</sub> O <sub>11</sub>              | 284, 255, 227, 151 | Kaempferol glucoside 2                                             | Phenylpropanoids and polyketides | Flavonoids | Flavonoid glycosides | ✓ | ✓ | ✓ | ✓ |



|    |          |                    |       |                                                              |                    |                                      |                                  |               |                      |   |   |   |   |
|----|----------|--------------------|-------|--------------------------------------------------------------|--------------------|--------------------------------------|----------------------------------|---------------|----------------------|---|---|---|---|
| 41 | 665.1470 | [M-H] <sup>-</sup> | 15.47 | C <sub>29</sub> H <sub>30</sub> O <sub>18</sub> <sup>+</sup> | 621, 579, 621, 284 | Cyanidin 3-(6''-malonylsambubioside) | Phenylpropanoids and polyketides | Flavonoids    | Flavonoid glycosides | ✗ | ✓ | ✗ | ✗ |
| 42 | 593.1537 | [M-H] <sup>-</sup> | 15.87 | C <sub>27</sub> H <sub>30</sub> O <sub>15</sub>              | 285                | Kaempferol rutinoside                | Phenylpropanoids and polyketides | Flavonoids    | Flavonoid glycosides | ✓ | ✓ | ✓ | ✗ |
| 43 | 477.1078 | [M-H] <sup>-</sup> | 16.59 | C <sub>22</sub> H <sub>22</sub> O <sub>12</sub>              | 314                | Isorhamnetin-3-O-glucoside           | Phenylpropanoids and polyketides | Flavonoids    | Flavonoid glycosides | ✓ | ✗ | ✓ | ✓ |
| 44 | 623.1675 | [M-H] <sup>-</sup> | 16.98 | C <sub>28</sub> H <sub>32</sub> O <sub>16</sub>              | 315                | Isorhamnetin rutinoside              | Phenylpropanoids and polyketides | Flavonoids    | Flavonoid glycosides | ✓ | ✗ | ✗ | ✗ |
| 45 | 489.1056 | [M-H] <sup>-</sup> | 17.1  | C <sub>23</sub> H <sub>22</sub> O <sub>11</sub>              | 284, 255, 277, 151 | Kaempferol acetyl hexose             | Phenylpropanoids and polyketides | Flavonoids    | Flavonoid glycosides | ✗ | ✓ | ✓ | ✓ |
| 46 | 533.0982 | [M-H] <sup>-</sup> | 17.39 | C <sub>24</sub> H <sub>22</sub> O <sub>14</sub>              | 489, 285, 255      | Kaempferol malonylglucoside 1        | Phenylpropanoids and polyketides | Flavonoids    | Flavonoid glycosides | ✓ | ✓ | ✓ | ✓ |
| 47 | 449.1121 | [M-H] <sup>-</sup> | 18.01 | C <sub>21</sub> H <sub>22</sub> O <sub>11</sub>              | 287                | Isookanin-7-glucoside                | Phenylpropanoids and polyketides | Flavonoids    | Flavonoid glycosides | ✓ | ✓ | ✗ | ✓ |
| 48 | 533.0980 | [M-H] <sup>-</sup> | 18.87 | C <sub>24</sub> H <sub>22</sub> O <sub>14</sub>              | 489, 285, 255      | Kaempferol malonylglucoside 2        | Phenylpropanoids and polyketides | Flavonoids    | Flavonoid glycosides | ✓ | ✗ | ✓ | ✓ |
| 49 | 431.1024 | [M-H] <sup>-</sup> | 18.38 | C <sub>21</sub> H <sub>20</sub> O <sub>10</sub>              | 284, 255, 227, 163 | Kaempferol 3-O-rhamnoside/ Afzelin   | Phenylpropanoids and polyketides | Flavonoids    | Flavonoid glycosides | ✓ | ✗ | ✗ | ✗ |
| 50 | 519.1185 | [M-H] <sup>-</sup> | 18.65 | C <sub>24</sub> H <sub>24</sub> O <sub>13</sub>              | 314                | Isorhamnetin acetylglucoside         | Phenylpropanoids and polyketides | Flavonoids    | Flavonoid glycosides | ✓ | ✓ | ✓ | ✗ |
| 51 | 437.3382 | [M+H] <sup>+</sup> | 19.25 | C <sub>30</sub> H <sub>44</sub> O <sub>2</sub>               |                    | Cucurbita-5,23,25-triene-3,7-dione   | Lipid and lipid like molecules   | Prenol lipids | Triterpenoid         | ✗ | ✓ | ✗ | ✗ |
| 52 | 471.3433 | [M+H] <sup>+</sup> | 19.56 | C <sub>30</sub> H <sub>46</sub> O <sub>4</sub>               |                    | Momordic acid/ Balsaminol C          | Lipid and lipid like molecules   | Prenol lipids | Triterpenoid         | ✗ | ✓ | ✓ | ✓ |
| 53 | 573.1296 | [M-H] <sup>-</sup> | 19.68 | C <sub>27</sub> H <sub>26</sub> O <sub>14</sub>              | 285                | 6,7,3',4'-Tetrahydroxyaurone 6-      | Phenylpropanoids and polyketides | Flavonoids    | Flavonoid glycosides | ✗ | ✗ | ✗ | ✓ |

|    |          |                    |           |                                                   |          |                                                                                          |                                  |                                |                                       |   |   |   |   |
|----|----------|--------------------|-----------|---------------------------------------------------|----------|------------------------------------------------------------------------------------------|----------------------------------|--------------------------------|---------------------------------------|---|---|---|---|
|    |          |                    |           |                                                   |          | (2'',4'',6''-tri-acetylgluco-side)/Mari-timetin 6-O-(3'',4'',6''-tri-O-acetylglu-coside) |                                  |                                |                                       |   |   |   |   |
| 54 | 399.1333 | [M-H] <sup>-</sup> | 19.6<br>9 | C <sub>18</sub> H <sub>24</sub> O <sub>10</sub>   | 163, 145 | Regaloside A                                                                             | Phenylpropanoids and polyketides | Cinnamic acids and derivatives | Hydroxycinnamic acids and derivatives | ✗ | ✗ | ✓ | ✗ |
| 55 | 455.3480 | [M+H] <sup>+</sup> | 20.3<br>3 | C <sub>30</sub> H <sub>46</sub> O <sub>3</sub>    |          | Charantadiol A                                                                           | Lipid and lipid like molecules   | Prenol lipids                  | Triterpenoid                          | ✗ | ✓ | ✓ | ✗ |
| 56 | 601.4073 | [M+H] <sup>+</sup> | 21.8<br>2 | C <sub>36</sub> H <sub>56</sub> O <sub>7</sub>    |          | Charantoside IV/III                                                                      | Lipid and lipid like molecules   | Prenol lipids                  | Triterpenoid                          | ✗ | ✓ | ✗ | ✗ |
| 57 | 585.4103 | [M+H] <sup>+</sup> | 22.3<br>7 | C <sub>36</sub> H <sub>56</sub> O <sub>6</sub>    |          | Triacetyl-balsaminol                                                                     | Lipid and lipid like molecules   | Prenol lipids                  | Triterpenoid                          | ✓ | ✓ | ✓ | ✓ |
| 58 | 455.3484 | [M+H] <sup>+</sup> | 25.1<br>6 | C <sub>30</sub> H <sub>46</sub> O <sub>3</sub>    | 133, 119 | 3-Hydroxy-11-ursen-28,13-olide                                                           | Lipid and lipid like molecules   | Prenol lipids                  | Triterpenoid                          | ✗ | ✓ | ✓ | ✗ |
| 59 | 457.1479 | [M+H] <sup>+</sup> | 25.8<br>9 | <u>C<sub>30</sub>H<sub>48</sub>O<sub>3</sub></u>  |          | Balsaminol E                                                                             | Lipid and lipid like molecules   | Prenol lipids                  | Triterpenoid                          | ✗ | ✓ | ✗ | ✗ |
| 60 | 439.3570 | [M+H]              | 29.5<br>7 | C <sub>30</sub> H <sub>46</sub> O <sub>2</sub>    |          | Momordicin                                                                               | Lipid and lipid like molecules   | Prenol lipids                  | Triterpenoid                          | ✓ | ✓ | ✓ | ✓ |
| 61 | 695.4081 | [M-H] <sup>-</sup> | 30.0<br>0 | C <sub>37</sub> H <sub>60</sub> O <sub>12</sub>   |          | Momordicoside E                                                                          | Lipid and lipid like molecules   | Prenol lipids                  | Triterpenoid                          | ✗ | ✗ | ✗ | ✓ |
| 62 | 677.4301 | [2M-2H+Na]         | 31.1<br>8 | C <sub>18</sub> H <sub>32</sub> O <sub>5</sub>    | 327      | (10E,15E)-9,12,13-trihydroxyoctadeca-10,15-dienoic acid                                  | Lipid and lipid like molecules   | Prenol lipids                  | Fatty acyl                            | ✓ | ✓ | ✓ | ✗ |
| 63 | 327.2203 | [M-H] <sup>-</sup> | 31.8<br>3 | C <sub>18</sub> H <sub>32</sub> O <sub>4</sub>    | 171, 239 | FA 18:2+2O                                                                               | Lipid and lipid like molecules   | Prenol lipids                  | Fatty acid                            | ✓ | ✓ | ✓ | ✓ |
| 64 | 454.2896 | [M+H] <sup>+</sup> | 34.5<br>2 | C <sub>21</sub> H <sub>44</sub> NO <sub>7</sub> P | 313      | 1-Palmitoyl-2-hydroxy-sn-glycero-3-                                                      | Lipid and lipid like molecules   | Glycerophosphoethanolamines    | Glycerophospholipid                   | ✓ | ✓ | ✓ | ✓ |

|    |          |                    |       |                                                   |                    |                                                                                                                                         |                                |                        |                      |   |   |   |   |
|----|----------|--------------------|-------|---------------------------------------------------|--------------------|-----------------------------------------------------------------------------------------------------------------------------------------|--------------------------------|------------------------|----------------------|---|---|---|---|
|    |          |                    |       |                                                   |                    | phosphoethanolamine                                                                                                                     |                                |                        |                      |   |   |   |   |
| 65 | 496.4062 | [M+H] <sup>+</sup> | 35.57 | C <sub>25</sub> H <sub>54</sub> NO <sub>6</sub> P | 478, 313, 184, 104 | 1-O-Hexadecyl-2-C-methyl-3-phosphatidylcholine                                                                                          | Lipid and lipid like molecules | Glycerophosphocholines | Glycerophospholipids | ✓ | ✓ | ✓ | ✓ |
| 66 | 841.4644 | [M+FA-H]           | 36.52 | C <sub>41</sub> H <sub>64</sub> O <sub>15</sub>   | 795, 633           | Diginatin/1-O-[(2beta,3beta,5xi,9xi,18xi)-2,23-Dihydroxy-28,29-dioxo-3-(beta-D-xylopyranosyloxy)olean-12-en-28-yl]-beta-D-glucopyranose | Lipid and lipid like molecules | Steroidal glycosides   | Triterpenoids        | ✗ | ✗ | ✗ | ✓ |
| 67 | 522.3524 | [M+H] <sup>+</sup> | 36.64 | C <sub>26</sub> H <sub>52</sub> NO <sub>7</sub> P | 522, 504, 184      | 1-(9Z-Octadecenyl)-sn-glycero-3-phosphocholine                                                                                          | Lipid and lipid like molecules | Glycerophosphocholines | Glycerophospholipids | ✗ | ✓ | ✓ | ✗ |
| 68 | 713.4168 | [M-H] <sup>-</sup> | 36.85 | C <sub>37</sub> H <sub>62</sub> O <sub>13</sub>   | 505, 575, 179      | Cyclopasifloside VII                                                                                                                    | Lipid and lipid like molecules | Prenol lipids          | Terpene glycosides   | ✗ | ✗ | ✗ | ✓ |
| 69 | 757.4440 | [M+FA-H]           | 36.85 | C <sub>38</sub> H <sub>58</sub> O <sub>15</sub>   |                    | NCGC00347358-02_C38H58O15_Card-20(22)-enolide, 1-(acetyloxy)-3-[[[(1R)-4-O-(6-deoxy-3-O-methylhexopyra-                                 | Lipid and lipid like molecules | Prenol lipids          | Fatty acid           | ✓ | ✗ | ✓ | ✓ |

|    |          |                    |           |                                                 |                    |                                                                                                                                                                                                    |                                |               |                    |   |   |   |   |
|----|----------|--------------------|-----------|-------------------------------------------------|--------------------|----------------------------------------------------------------------------------------------------------------------------------------------------------------------------------------------------|--------------------------------|---------------|--------------------|---|---|---|---|
|    |          |                    |           |                                                 |                    | nosyl)hex-<br>opyra-<br>nosyl]oxy]-<br>14-hydroxy-,<br>(1beta,3beta,<br>8xi,9xi)-                                                                                                                  |                                |               |                    |   |   |   |   |
| 70 | 779.4178 | [M-H] <sup>-</sup> | 37.4<br>6 | C <sub>41</sub> H <sub>64</sub> O <sub>14</sub> |                    | Cynarasaponin I/F                                                                                                                                                                                  | Lipid and lipid like molecules | Prenol lipids | Terpene glycosides | × | × | × | ✓ |
| 71 | 939.5057 | [M-H] <sup>-</sup> | 38.6<br>8 | C <sub>48</sub> H <sub>76</sub> O <sub>18</sub> |                    | Momordin IIa                                                                                                                                                                                       | Lipid and lipid like molecules | Prenol lipids | Terpene glycosides | × | ✓ | × | × |
| 72 | 681.4162 | [M-H] <sup>-</sup> | 38.9<br>4 | C <sub>37</sub> H <sub>62</sub> O <sub>11</sub> |                    | Cyclopasifloside II                                                                                                                                                                                | Lipid and lipid like molecules | Prenol lipids | Terpene glycosides | ✓ | ✓ | × | × |
| 73 | 811.5127 | M+HCO<br>O         | 38.8<br>9 | C <sub>43</sub> H <sub>72</sub> O <sub>14</sub> | 765, 661, 619      | Ginsenoside Rg6                                                                                                                                                                                    | Lipid and lipid like molecules | Prenol lipids | Terpene glycosides | × | ✓ | × | × |
| 74 | 741.4494 | [M+FA-H]           | 39.3<br>5 | C <sub>35</sub> H <sub>52</sub> O <sub>14</sub> | 695, 533, 363, 179 | Xysmalorin/<br>NCGC00385<br>195-<br>01_C35H52O<br>14_Carda-<br>5,20(22)-<br>dienolide, 3-<br>[(2-O-beta-D-<br>glucopyra-<br>nosyl-beta-<br>D-glucopyra-<br>nosyl)oxy]-<br>14-hydroxy-,<br>(3beta)- | Lipid and lipid like molecules | Prenol lipids | Terpene glycosides | × | × | × | ✓ |
| 75 | 825.4726 | [M-H] <sup>-</sup> | 40.1<br>3 | C <sub>43</sub> H <sub>70</sub> O <sub>15</sub> |                    | Trojanoside A/<br>Astragaloside II                                                                                                                                                                 | Lipid and lipid like molecules | Prenol lipids | Terpene glycosides | ✓ | ✓ | × | × |
| 76 | 841.4526 | [M-H] <sup>-</sup> | 40.2<br>5 | C <sub>43</sub> H <sub>70</sub> O <sub>16</sub> |                    | Goyaglycoside-g                                                                                                                                                                                    | Lipid and lipid like molecules | Prenol lipids | Terpene glycosides | ✓ | × | ✓ | ✓ |

|    |          |                    |       |                                                               |                              |                                                                                                     |                                |                        |                      |   |   |   |   |
|----|----------|--------------------|-------|---------------------------------------------------------------|------------------------------|-----------------------------------------------------------------------------------------------------|--------------------------------|------------------------|----------------------|---|---|---|---|
| 77 | 524.3675 | [M+H] <sup>+</sup> | 40.49 | C <sub>26</sub> H <sub>54</sub> NO <sub>7</sub> P             | 506, 447, 341, 258, 184, 104 | 1-Octadecanoyl-sn-glycero-3-phosphocholine                                                          | Lipid and lipid like molecules | Glycerophosphocholines | Glycerophospholipid  | × | ✓ | ✓ | ✓ |
| 78 | 697.4214 | [M-H] <sup>-</sup> | 41.11 | C <sub>37</sub> H <sub>62</sub> O <sub>12</sub>               |                              | Cyclopasifloside VIII/IV, X                                                                         | Lipid and lipid like molecules | Prenol lipids          | Terpene glycosides   | × | × | × | ✓ |
| 79 | 827.4794 | [M-H] <sup>-</sup> | 41.31 | C <sub>43</sub> H <sub>72</sub> O <sub>15</sub>               |                              | Vinaginsenoside R2                                                                                  | Lipid and lipid like molecules | Prenol lipids          | Terpene glycosides   | × | ✓ | × | × |
| 80 | 843.4683 | [M-H] <sup>-</sup> | 41.81 | C <sub>43</sub> H <sub>72</sub> O <sub>16</sub>               | 179                          | Cyclotri-<br>cuspidoside A/<br>Cyclopasifloside III                                                 | Lipid and lipid like molecules | Prenol lipids          | Terpene glycosides   | × | × | ✓ | × |
| 81 | 867.5450 | [M-H] <sup>-</sup> | 45.27 | C <sub>45</sub> H <sub>72</sub> O <sub>16</sub>               |                              | Astragaloside I/Isoastragaloside I                                                                  | Lipid and lipid like molecules | Prenol lipids          | Terpene glycosides   | ✓ | × | × | × |
| 82 | 552.3992 | [M+H] <sup>+</sup> | 45.69 | C <sub>28</sub> H <sub>58</sub> NO <sub>7</sub> P             | 258, 184                     | 1-Arachidoyl-2-hydroxy-sn-glycero-3-phosphocholine                                                  | Lipid and lipid like molecules | Glycerophosphocholines | Glycerophospholipids | ✓ | ✓ | × | × |
| 83 | 593.1460 | [M+H] <sup>+</sup> | 45.71 | C <sub>35</sub> H <sub>36</sub> N <sub>4</sub> O <sub>5</sub> |                              | Pheophorbide A                                                                                      | Organoheterocyclic compounds   | Porphyrins             | Tetrapyrroles        | ✓ | × | ✓ | ✓ |
| 84 | 721.4252 | [M-H] <sup>-</sup> | 46.03 | C <sub>33</sub> H <sub>56</sub> O <sub>14</sub>               | 277, 101                     | Glc-Glc-octadecatrienoyl-sn-glycerol                                                                | Lipid and lipid like molecules | Glycerophosphocholines | Fatty acid           | ✓ | ✓ | ✓ | ✓ |
| 85 | 881.5119 | [M-H] <sup>-</sup> | 46.86 | C <sub>47</sub> H <sub>79</sub> O <sub>13</sub> P             |                              | Massbank: LQB00300 PI 38:6 [1-Hexadecanoyloxy-3-[hydroxy-(2,3,4,5,6-pentahydroxycyclohexyl)oxyphos- | Lipid and lipid like molecules | Glycerophosphocholines | Glycerophospholipid  | ✓ | × | × | ✓ |

|    |          |                    |       |                                                   |                              |                                                                                   |                                  |                        |                           |   |   |   |   |
|----|----------|--------------------|-------|---------------------------------------------------|------------------------------|-----------------------------------------------------------------------------------|----------------------------------|------------------------|---------------------------|---|---|---|---|
|    |          |                    |       |                                                   |                              | phoryl]oxy-propan-2-yl] (4Z,7Z,10Z,13Z,16Z,19Z)-docosa-4,7,10,13,16,19-hexaenoate |                                  |                        |                           |   |   |   |   |
| 86 | 599.326  | [M-H] <sup>-</sup> | 47.47 | C <sub>27</sub> H <sub>53</sub> O <sub>12</sub> P |                              | 1-Octadecanoyl-sn-glycero-3-phospho-(1'-myo-inositol)                             | Lipid and lipid like molecules   | Glycerophosphocholines | Glycerophospholipid       | ✓ | ✗ | ✓ | ✓ |
| 87 | 511.4    | [M-H] <sup>-</sup> | 47.58 | C <sub>24</sub> H <sub>49</sub> O <sub>9</sub> P  |                              | 1-Octadecanoyl-sn-glycero-3-phospho-(1'-sn-glycerol)                              | Lipid and lipid like molecules   | Glycerophosphocholines | Glycerophospholipid       | ✗ | ✓ | ✓ | ✓ |
| 88 | 311.189  | [M-H] <sup>-</sup> | 47.60 | C <sub>18</sub> H <sub>16</sub> O <sub>5</sub>    | 297, 267, 253                | Trimethoxyflavone                                                                 | Phenylpropanoids and polyketides | Flavonoids             | 6-O-methylated flavonoids | ✓ | ✗ | ✗ | ✗ |
| 89 | 747.525  | [M-H] <sup>-</sup> | 47.62 | C <sub>40</sub> H <sub>77</sub> O <sub>10</sub> P |                              | 1-Palmitoyl-2-oleoyl-sn-glycero-3-(phosphorac-(1-glycerol))                       | Lipid and lipid like molecules   | Glycerophosphocholines | Glycerophospholipid       | ✓ | ✗ | ✓ | ✗ |
| 90 | 673.477  | [M-H] <sup>-</sup> | 47.79 | C <sub>37</sub> H <sub>71</sub> O <sub>8</sub> P  |                              | (2R)-1-Hexadecanoyloxy-3-phosphonooxypropan-2-yl] (E)-octadec-9-enoate            | Lipid and lipid like molecules   | Glycerophosphocholines | Glycerophospholipid       | ✗ | ✗ | ✗ | ✓ |
| 91 | 782.5674 | [M+H] <sup>+</sup> | 47.90 | C <sub>44</sub> H <sub>80</sub> NO <sub>8</sub> P | 184                          | 1,2-Dilinoleoyl-sn-glycero-3-phosphocholine                                       | Lipid and lipid like molecules   | Glycerophosphocholines | Glycerophospholipids      | ✓ | ✗ | ✗ | ✓ |
| 92 | 835.5298 | [M-H] <sup>-</sup> | 47.95 | C <sub>43</sub> H <sub>81</sub> O <sub>13</sub> P | 673, 595, 597, 571, 533, 417 | 1-Hexadecanoyl-2-(9Z-                                                             | Lipid and lipid like molecules   | Glycerophosphocholines | Glycerophospholipid       | ✗ | ✗ | ✗ | ✓ |

|     |          |                    |       |                                                               |          |                                                                     |                                |                             |                              |   |   |   |   |
|-----|----------|--------------------|-------|---------------------------------------------------------------|----------|---------------------------------------------------------------------|--------------------------------|-----------------------------|------------------------------|---|---|---|---|
|     |          |                    |       |                                                               |          | octadecenoyl)-sn-glycero-3-phospho-(1'-myo-inositol)                |                                |                             |                              |   |   |   |   |
| 93  | 663.4499 | [M+H] <sup>+</sup> | 48.08 | C <sub>38</sub> H <sub>62</sub> O <sub>9</sub>                |          | Goyaglycoside d                                                     | Lipid and lipid like molecules | Prenol lipids               | Triterpenoid                 | ✓ | ✓ | ✓ | ✓ |
| 94  | 701.461  | [M-H]              | 48.10 | C <sub>39</sub> H <sub>75</sub> O <sub>8</sub> P              |          | [3-[octadec-11-enoyloxy]-2-(octadecanoyloxy)propoxy]phosphonic acid | Lipid and lipid like molecules | Glycerophosphocholines      | Glycerophospholipid          | ✓ | ✗ | ✓ | ✓ |
| 95  | 325.1872 | [M-H] <sup>-</sup> | 48.50 | C <sub>22</sub> H <sub>46</sub> O                             |          | Docosanol                                                           | Lipid and lipid like molecules | Fatty Acyls                 | Fatty alcohol                | ✓ | ✓ | ✓ | ✓ |
| 95  | 871.5692 | [M+H] <sup>+</sup> | 48.53 | C <sub>55</sub> H <sub>74</sub> N <sub>4</sub> O <sub>5</sub> | 593, 533 | Pheophytin A                                                        | Lipid and lipid like molecules | Glycerophosphoethanolamines | Glycerophospholipid          | ✗ | ✓ | ✗ | ✗ |
| 97  | 712.5421 | [M-H]              | 48.71 | C <sub>40</sub> H <sub>75</sub> NO <sub>9</sub>               | 550      | (+)-Soyacerebroside I                                               | Lipid and lipid like molecules | sphingolipids               | Glycosyl-n-acyl-sphingosines | ✓ | ✓ | ✓ | ✓ |
| 98  | 760.5822 | [M+H] <sup>+</sup> | 48.57 | C <sub>42</sub> H <sub>82</sub> NO <sub>8</sub> P             | 184      | 1-Hexadecanoyl-2-(9Z-octadecenoyl)-sn-glycero-3-phosphocholine      | Lipid and lipid like molecules | Glycerophosphocholines      | Glycerophospholipid          | ✗ | ✗ | ✓ | ✗ |
| 99  | 483.3442 | [M-H] <sup>-</sup> | 49.00 | C <sub>22</sub> H <sub>45</sub> O <sub>9</sub> P              |          | 1-Hexadecanoyl-sn-glycero-3-phospho-(1'-sn-glycerol)                | Lipid and lipid like molecules | Glycerophosphocholines      | Glycerophospholipid          | ✓ | ✓ | ✓ | ✓ |
| 100 | 571.358  | [M-H] <sup>-</sup> | 49.16 | C <sub>25</sub> H <sub>49</sub> O <sub>12</sub> P             |          | 1-Hexadecanoyl-sn-glycero-3-phospho-(1'-myo-inositol)               | Lipid and lipid like molecules | Glycerophosphocholines      | Glycerophospholipid          | ✓ | ✓ | ✓ | ✓ |

**Table S2:** Pathway analysis of metabolites identified in the four *Momordica* species

| No | Pathway                                                | Total | Hits | p-value  | Impact  |
|----|--------------------------------------------------------|-------|------|----------|---------|
| 1  | Biosynthesis of secondary metabolites – unclassified   | 5     | 1    | 0.10964  | 1       |
| 2  | Flavone and flavonol biosynthesis                      | 10    | 5    | 1.09E-06 | 0.85    |
| 3  | Phenylalanine metabolism                               | 11    | 1    | 0.22586  | 0.47059 |
| 4  | Glycerophospholipid metabolism                         | 37    | 3    | 0.050294 | 0.19174 |
| 5  | Glyoxylate and dicarboxylate metabolism                | 29    | 2    | 0.14109  | 0.16151 |
| 6  | Pyruvate metabolism                                    | 22    | 1    | 0.40187  | 0.15462 |
| 7  | Tryptophan metabolism                                  | 28    | 1    | 0.4808   | 0.12037 |
| 8  | Phenylpropanoid biosynthesis                           | 46    | 4    | 0.019014 | 0.0945  |
| 9  | Citrate cycle (TCA cycle)                              | 20    | 2    | 0.074932 | 0.07816 |
| 10 | Sphingolipid metabolism                                | 17    | 1    | 0.3273   | 0.0625  |
| 11 | Carbon fixation in photosynthetic organisms            | 21    | 1    | 0.38763  | 0.05846 |
| 12 | Inositol phosphate metabolism                          | 28    | 1    | 0.4808   | 0.04393 |
| 13 | Flavonoid biosynthesis                                 | 47    | 3    | 0.089942 | 0.0348  |
| 14 | Porphyrin and chlorophyll metabolism                   | 48    | 2    | 0.30201  | 0.02305 |
| 15 | Phosphatidylinositol signaling system                  | 26    | 1    | 0.45569  | 0.01559 |
| 16 | Glycosylphosphatidylinositol (GPI)-anchor biosynthesis | 13    | 1    | 0.26122  | 0.00476 |
| 17 | Phenylalanine, tyrosine and tryptophan biosynthesis    | 22    | 2    | 0.088563 | 0.0015  |
| 18 | Ubiquinone and other terpenoid-quinone biosynthesis    | 38    | 1    | 0.59044  | 0.00097 |
| 19 | Arachidonic acid metabolism                            | 12    | 2    | 0.029169 | 0       |
| 20 | Linoleic acid metabolism                               | 4     | 1    | 0.088687 | 0       |
| 21 | Indole alkaloid biosynthesis                           | 4     | 1    | 0.088687 | 0       |
| 22 | Tropane, piperidine and pyridine alkaloid biosynthesis | 8     | 1    | 0.16972  | 0       |
| 23 | Anthocyanin biosynthesis                               | 11    | 1    | 0.22586  | 0       |
| 24 | Aminoacyl-tRNA biosynthesis                            | 46    | 2    | 0.2847   | 0       |
| 25 | Pentose phosphate pathway                              | 19    | 1    | 0.35815  | 0       |
| 26 | Biosynthesis of unsaturated fatty acids                | 22    | 1    | 0.40187  | 0       |
| 27 | Glucosinolate biosynthesis                             | 65    | 2    | 0.44436  | 0       |
| 28 | alpha-Linolenic acid metabolism                        | 28    | 1    | 0.4808   | 0       |
| 29 | Cyanoamino acid metabolism                             | 29    | 1    | 0.49294  | 0       |
| 30 | Glycine, serine and threonine metabolism               | 33    | 1    | 0.53877  | 0       |
